# Supplementary material
Source: Royal Society of Chemistry journal article supplement (doi:10.1039/d6dt00244g)
Supplement: d6dt00244g1.pdf [file d6dt00244g1.pdf]

(†ESI) Electronic Supplementary Information for  
Optical and dielectric properties of Sillén Bi<sub>2</sub>Y<sub>1-x</sub>M<sub>x</sub>O<sub>4</sub>Cl (M = Cu, Cd)

Meena Sheokand<sup>§</sup>, Shivangi Rao<sup>§</sup>, Neetu Yadav and Rajamani Nagarajan\*

Materials Chemistry Group, Department of Chemistry

University of Delhi, Delhi-110007 INDIA

\*Corresponding Author: [rnagarajan@chemistry.du.ac.in](mailto:rnagarajan@chemistry.du.ac.in)

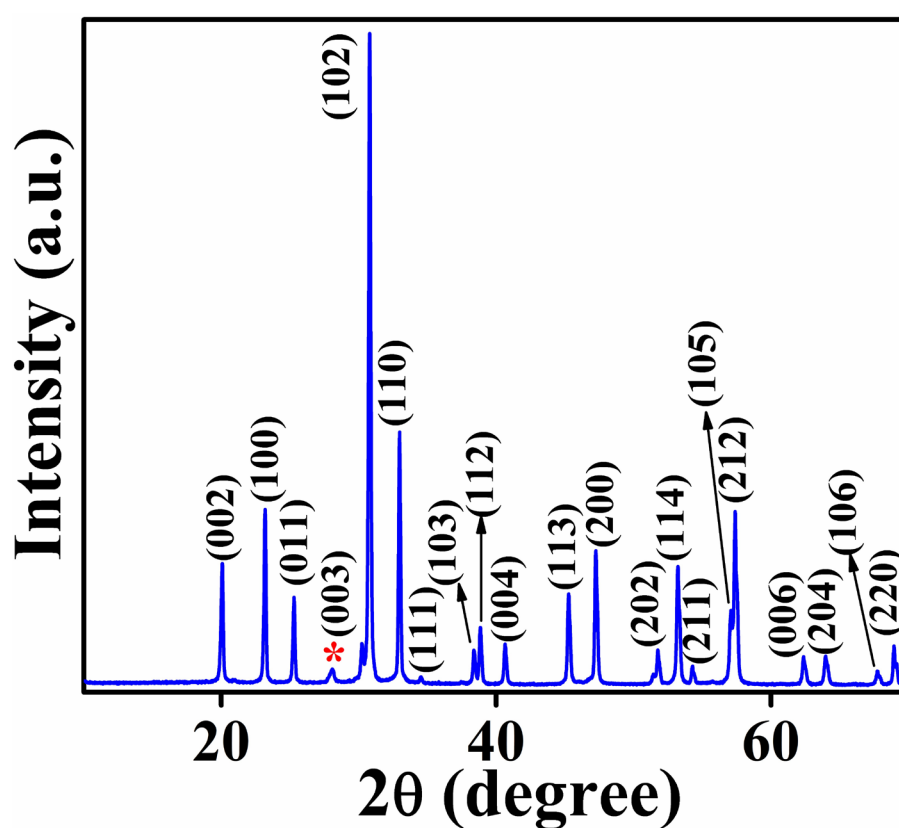

**Fig. S1** PXR D pattern of Bi<sub>2</sub>Y<sub>0.70</sub>Cu<sub>0.30</sub>O<sub>4</sub>Cl sample. The diffraction peak marked with ‘\*’ corresponds to β-Bi<sub>2</sub>O<sub>3</sub> (ICSD No: 98-002-7157).

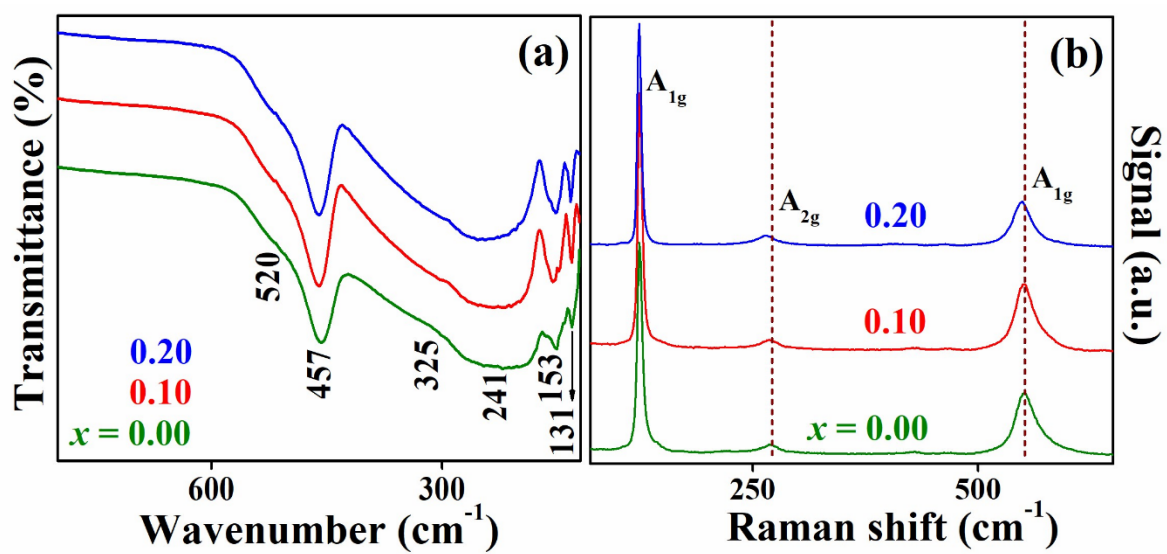

**Fig. S2**(a) FTIR, and (b) Micro-Raman spectra of  $\text{Bi}_2\text{Y}_{1-x}\text{Cu}_x\text{O}_4\text{Cl}$  ( $x = 0.00, 0.10, \text{ and } 0.20$ ) samples.

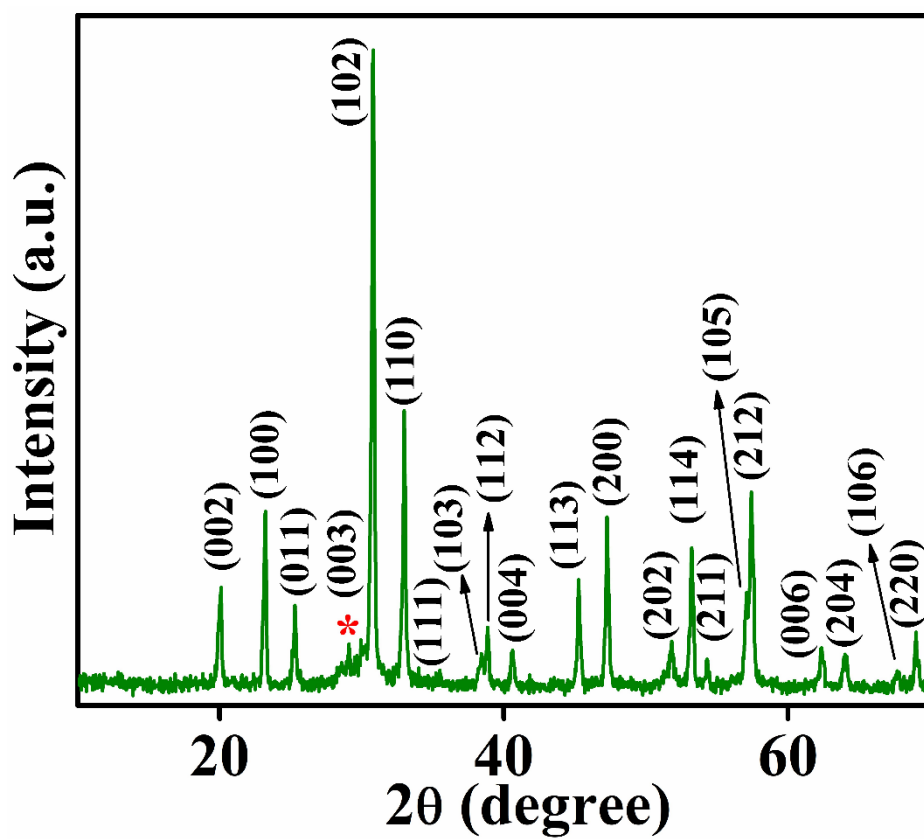

**Fig. S3** PXR D pattern of  $\text{Bi}_2\text{Y}_{0.70}\text{Cd}_{0.30}\text{O}_4\text{Cl}$  sample. The diffraction peak marked with ‘\*’ corresponds to  $\beta\text{-Bi}_2\text{O}_3$  (ICSD No: 98-0041764).

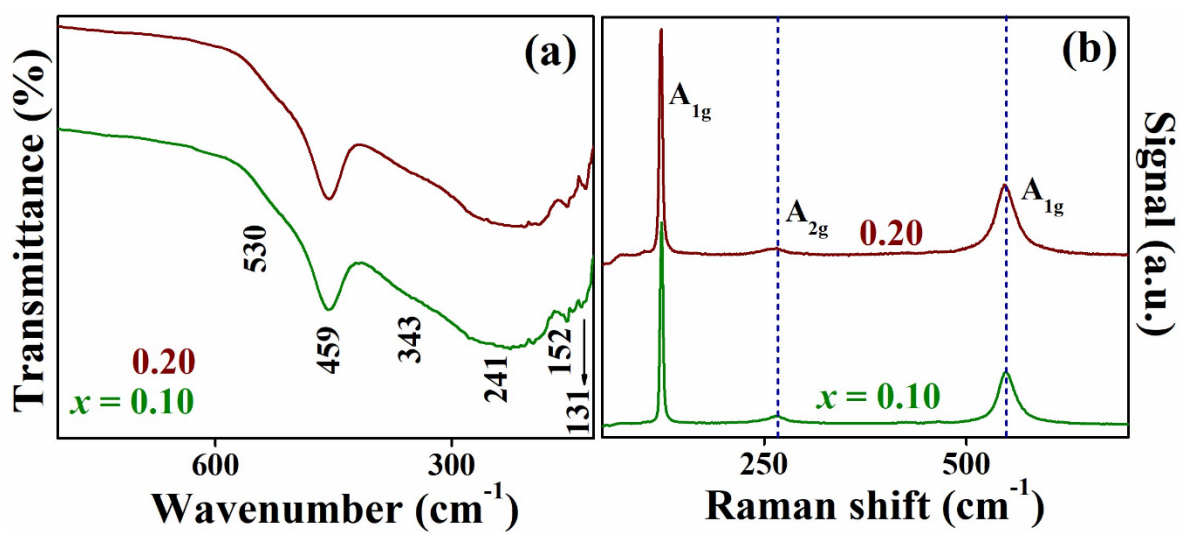

Fig. S4 (a) FTIR spectra, and (b) Micro-Raman of  $\text{Bi}_2\text{Y}_{1-x}\text{Cd}_x\text{O}_4\text{Cl}$  ( $x = 0.10$  and  $0.20$ ) samples.

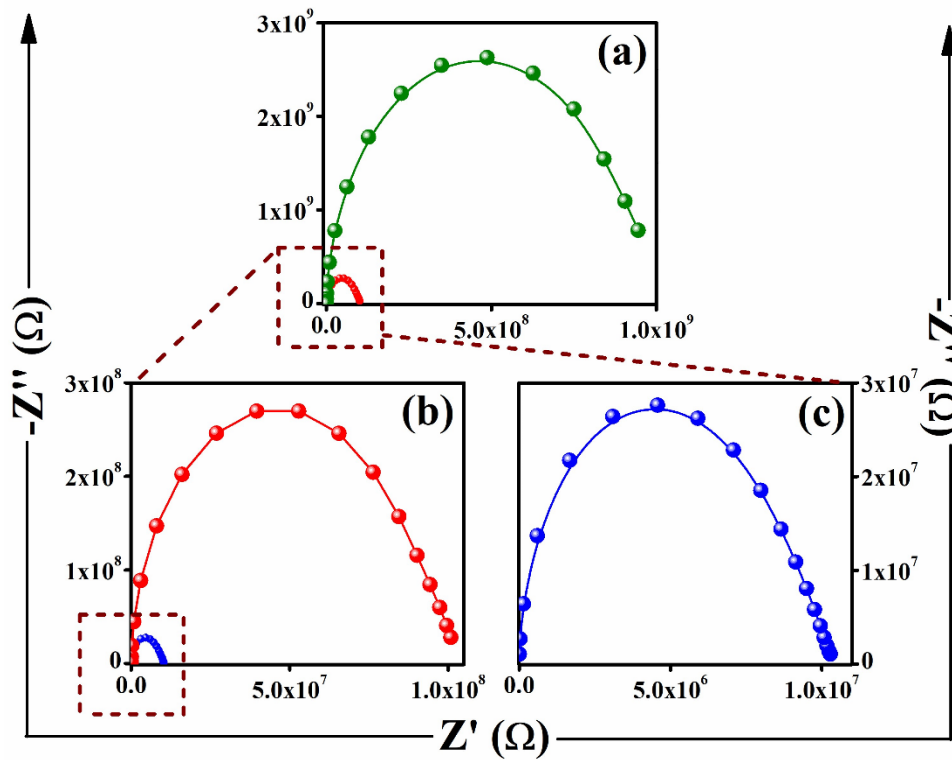

**Fig. S5** Complex impedance variation plots as a function of temperature for the  $\text{Bi}_2\text{Y}_{0.80}\text{Cu}_{0.20}\text{O}_4\text{Cl}$  sample recorded at different frequencies: (a) 1 Hz, (b) 10 Hz, and (c) 100 Hz.

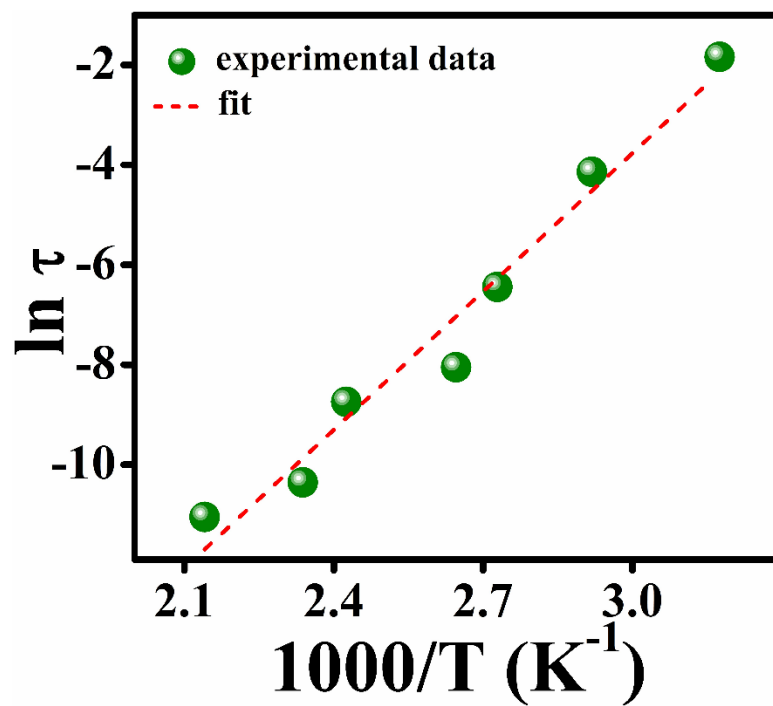

**Fig. S6** Plot of  $\ln \tau$  vs.  $1000/T$  for  $\text{Bi}_2\text{Y}_{0.80}\text{Cd}_{0.20}\text{O}_4\text{Cl}$  sample.

**Table S1** Details dealing with the amounts of reactants used to synthesize Cu- and Cd-substituted Bi<sub>2</sub>YO<sub>4</sub>Cl samples.

| <b>Bi<sub>2</sub>Y<sub>1-x</sub>Cu<sub>x</sub>O<sub>4</sub>Cl</b>                                                                                                                                                                                                                                       |                                               |                                              |                           |
|---------------------------------------------------------------------------------------------------------------------------------------------------------------------------------------------------------------------------------------------------------------------------------------------------------|-----------------------------------------------|----------------------------------------------|---------------------------|
| <b>Composition</b>                                                                                                                                                                                                                                                                                      | <b>YCl<sub>3</sub>.6H<sub>2</sub>O (mmol)</b> | <b>Cu(NO<sub>3</sub>)<sub>2</sub> (mmol)</b> | <b>Citric Acid (mmol)</b> |
| $x = 0.00$                                                                                                                                                                                                                                                                                              | 0.3033 g (1.00)                               | --                                           | 0.5187 g (2.70)           |
| $x = 0.10$                                                                                                                                                                                                                                                                                              | 0.2730 g (0.90)                               | 0.0241 g (0.10)                              | 0.5129 g (2.67)           |
| $x = 0.20$                                                                                                                                                                                                                                                                                              | 0.2427 g (0.80)                               | 0.0483 g (0.20)                              | 0.5073 g (2.64)           |
| $x = 0.30$                                                                                                                                                                                                                                                                                              | 0.2123 g (0.70)                               | 0.0724 g (0.30)                              | 0.5013 g (2.61)           |
| <b>Bi<sub>2</sub>Y<sub>1-x</sub>Cd<sub>x</sub>O<sub>4</sub>Cl</b>                                                                                                                                                                                                                                       |                                               |                                              |                           |
| <b>Composition</b>                                                                                                                                                                                                                                                                                      | <b>YCl<sub>3</sub>.6H<sub>2</sub>O (mmol)</b> | <b>CdCO<sub>3</sub> (mmol)</b>               | <b>Citric Acid (mmol)</b> |
| $x = 0.10$                                                                                                                                                                                                                                                                                              | 0.2730 g (0.90)                               | 0.0172 g (0.10)                              | 0.5129 g (2.67)           |
| $x = 0.20$                                                                                                                                                                                                                                                                                              | 0.2427 g (0.80)                               | 0.0344 g (0.20)                              | 0.5073 g (2.64)           |
| $x = 0.30$                                                                                                                                                                                                                                                                                              | 0.2123 g (0.70)                               | 0.0517 g (0.3)                               | 0.5013 g (2.61)           |
| <p>One mmol (0.4659 g) of Bi<sub>2</sub>O<sub>3</sub> was reacted in all the above reactions.<br/>           Bi<sub>2</sub>Y<sub>1-x</sub>Cu<sub>x</sub>O<sub>4</sub>Cl and Bi<sub>2</sub>Y<sub>1-x</sub>Cd<sub>x</sub>O<sub>4</sub>Cl compositions were calcined at 800 °C for three hours in air.</p> |                                               |                                              |                           |

**Table S2** Interplanar distances ( $d$ ) of the  $\text{Bi}_2\text{YO}_4\text{Cl}$  and  $\text{Bi}_2\text{Y}_{0.80}\text{M}_{0.20}\text{O}_4\text{Cl}$  ( $\text{M} = \text{Cu}$  and  $\text{Cd}$ ) samples.

| Composition                                                                       | $d_{(002)}$ (Å) | $d_{(004)}$ (Å) | $d_{(101)}$ (Å) | $d_{(102)}$ (Å) |
|-----------------------------------------------------------------------------------|-----------------|-----------------|-----------------|-----------------|
| <b><math>\text{Bi}_2\text{YO}_4\text{Cl}</math></b>                               | 4.3823          | 3.8044          | 2.2119          | 1.9163          |
| <b><math>\text{Bi}_2\text{Y}_{0.80}\text{Cu}_{0.20}\text{O}_4\text{Cl}</math></b> | 4.4075          | 3.8299          | 2.2163          | 1.9204          |
| <b><math>\text{Bi}_2\text{Y}_{0.80}\text{Cd}_{0.20}\text{O}_4\text{Cl}</math></b> | 4.4556          | 3.8603          | 2.2268          | 1.9270          |

**Table S3** Selected bond distances of  $\text{Bi}_2\text{YO}_4\text{Cl}$ ,  $\text{Bi}_2\text{Y}_{0.80}\text{Cu}_{0.20}\text{O}_4\text{Cl}$ , and  $\text{Bi}_2\text{Y}_{0.80}\text{Cd}_{0.20}\text{O}_4\text{Cl}$  samples obtained from the Rietveld refinements.

| Sample                                                          | Interatomic distances (Å) |                      |                      |
|-----------------------------------------------------------------|---------------------------|----------------------|----------------------|
|                                                                 | Y–O                       | Bi–O                 | Bi–Cl                |
| $\text{Bi}_2\text{YO}_4\text{Cl}$                               | $8 \times 2.3662(3)$      | $4 \times 2.2236(2)$ | $4 \times 3.3483(3)$ |
| $\text{Bi}_2\text{Y}_{0.80}\text{Cu}_{0.20}\text{O}_4\text{Cl}$ | $8 \times 2.3554(2)$      | $4 \times 2.2245(3)$ | $4 \times 2.3494(3)$ |
| $\text{Bi}_2\text{Y}_{0.80}\text{Cd}_{0.20}\text{O}_4\text{Cl}$ | $8 \times 2.3729(2)$      | $4 \times 2.2251(2)$ | $4 \times 3.3501(2)$ |

**Table S4** Summary of binding energies (B.E.) and spin-orbit splitting energies ( $\Delta E$ ) of constituents in  $\text{Bi}_2\text{Y}_{0.80}\text{M}_{0.20}\text{O}_2\text{Cl}$  ( $\text{M} = \text{Cu}$  and  $\text{Cd}$ ) after deconvoluting their core-level XPS.

| Constituent elements and B.E.<br>(eV) | $\text{Bi}_2\text{Y}_{0.80}\text{Cu}_{0.20}\text{O}_4\text{Cl}$ | $\text{Bi}_2\text{Y}_{0.80}\text{Cd}_{0.20}\text{O}_4\text{Cl}$ |       |
|---------------------------------------|-----------------------------------------------------------------|-----------------------------------------------------------------|-------|
| <b>Bi(III) 4f</b>                     | $4f_{7/2}$                                                      | 158.4                                                           | 158.8 |
|                                       | $4f_{5/2}$                                                      | 163.8                                                           | 164.1 |
| <b>Bi(V) 4f</b>                       | $4f_{7/2}$                                                      | 159.3                                                           | 160.2 |
|                                       | $4f_{5/2}$                                                      | 164.5                                                           | 165.5 |
|                                       | $\Delta E$                                                      | 5.5                                                             | 5.3   |
| <b>Y</b>                              | $3p_{3/2}$                                                      | 300.1                                                           | 299.2 |
|                                       | $3p_{1/2}$                                                      | 312.2                                                           | 311.9 |
|                                       | $\Delta E$                                                      | 12.1                                                            | 12.7  |
| <b>Cu 2p</b>                          | $2p_{3/2}$                                                      | 931.9                                                           | -     |
|                                       | $2p_{1/2}$                                                      | 951.6                                                           | -     |
|                                       | <i>s</i>                                                        | 939.7                                                           | -     |
|                                       | $\Delta E$                                                      | 19.7                                                            | -     |
| <b>Cd 3d</b>                          | $3d_{5/2}$                                                      | -                                                               | 404.9 |
|                                       | $3d_{3/2}$                                                      | -                                                               | 411.7 |
|                                       | $\Delta E$                                                      | -                                                               | 6.8   |
| <b>O 1s</b>                           | M–O                                                             | 528                                                             | 529.5 |
|                                       | O–H ads.                                                        | 529.6                                                           | 531.4 |
| <b>Cl 2p</b>                          | $2p_{3/2}$                                                      | 198.2                                                           | 197.6 |
|                                       | $2p_{1/2}$                                                      | 199.8                                                           | 199.3 |
